# Supplementary material for: Optoelectronic properties of octahedral molybdenum cluster-based materials at a single crystal level
Source: Royal Society of Chemistry journal article supplement (doi:10.1039/d3dt02501b), 2023-01-01
Supplement: d3dt02501b1.pdf [file d3dt02501b1.pdf]

## Supplementary Information

# Optoelectronic Properties of Octahedral Molybdenum Cluster-Based Materials at Single Crystal Level

Elena Segura-Sanchis, Ana Moreno, Fernando Ramiro-Manzano, Roberto Fenollosa,  
Marta Feliz and Pedro Atienzar

Instituto de Tecnología Química, Universitat Politècnica de València - Consejo Superior de  
Investigaciones Científicas (UPV-CSIC), Avd. de los Naranjos s/n, 46022 Valencia.

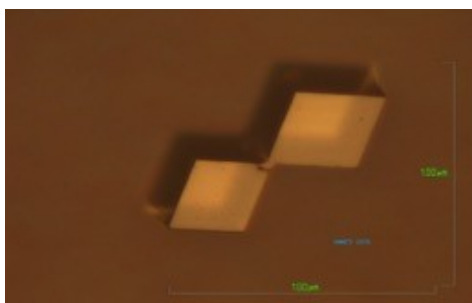

Minute 0

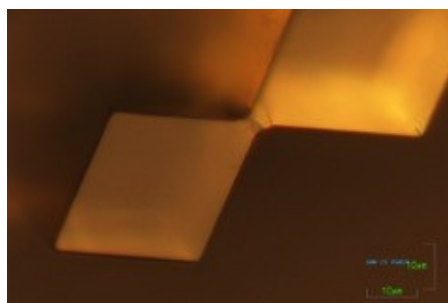

45 minutes

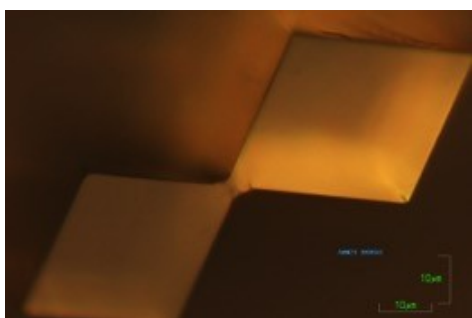

3 hours

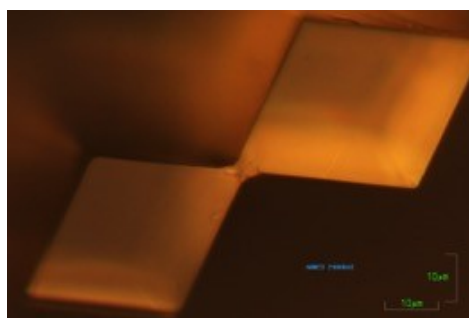

24 hours

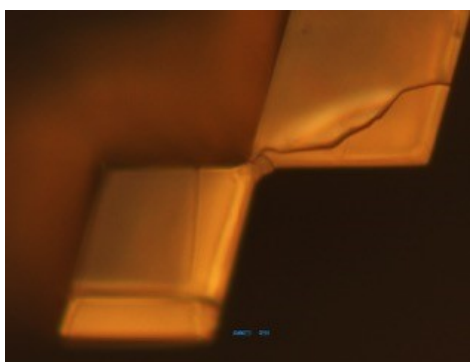

49 hours

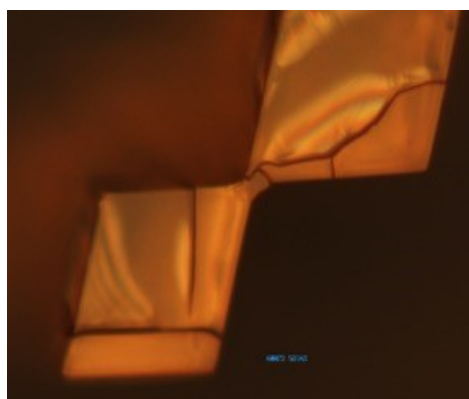

5 days

**Figure S1.** Time monitoring of the crystalline surface of **MoCl** single crystals under ambient conditions.

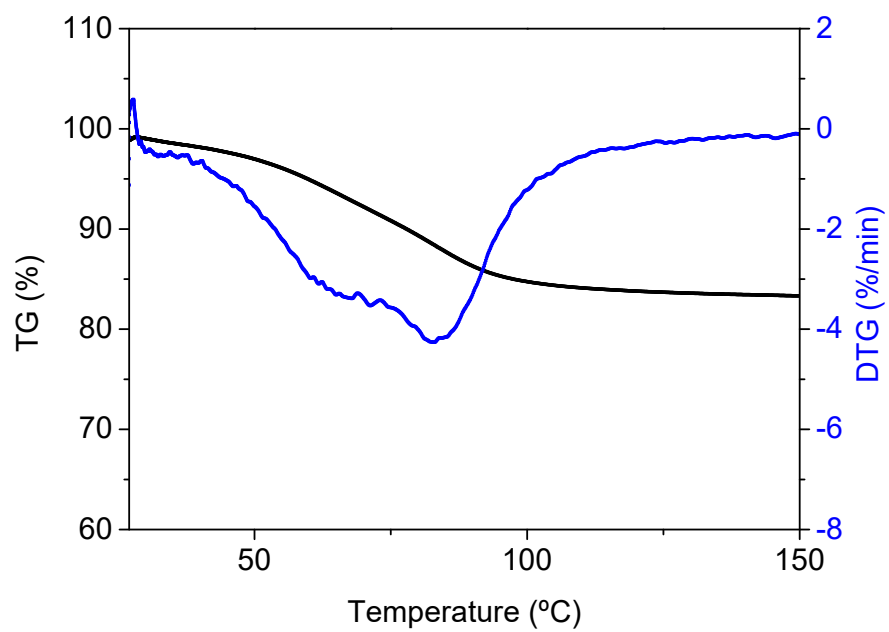

**Figure S2.** TG/DTG measurement of **MoCl** single crystals under air.

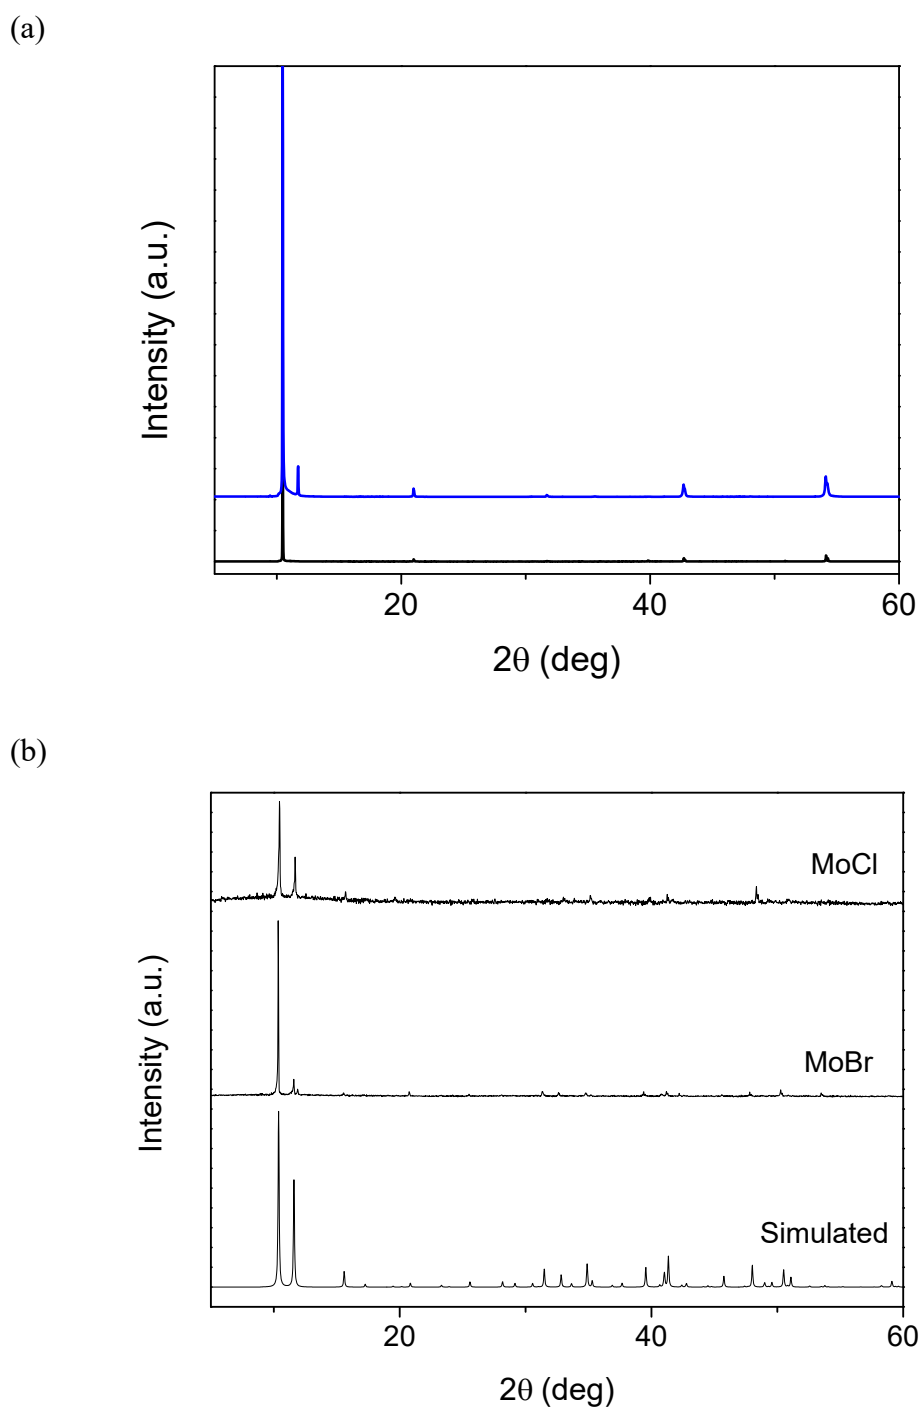

**Figure S3.** (a) Powder X-ray diffraction patterns of freshly prepared (black line) and aged (blue line) **MoCl** single crystals. (b) Powder X-ray diffractograms (from top to bottom) of aged **MoCl** and **MoBr** polycrystalline samples and the simulated pattern obtained from **MoBr** single crystal X-ray diffraction (ref. 15 of the manuscript).

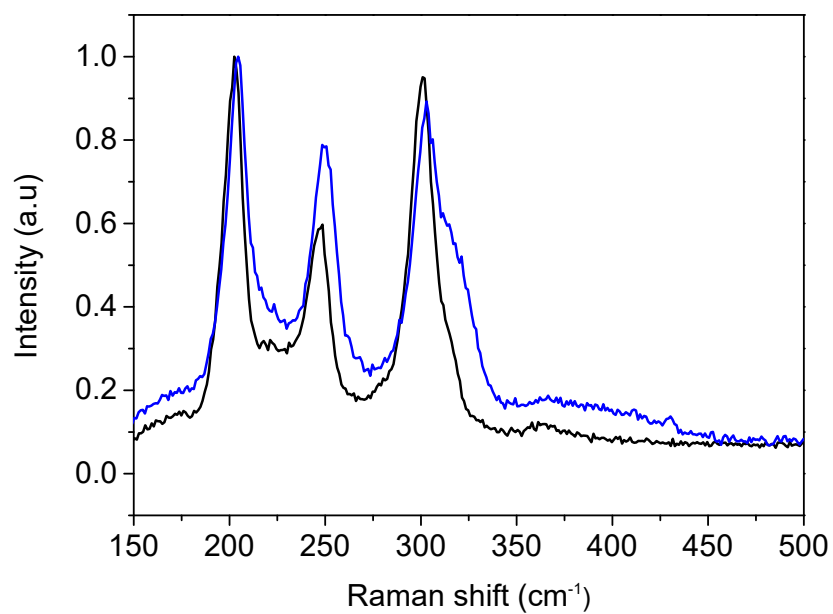

**Figure S4.** Raman spectra of freshly prepared (black line) and aged (blue line) **MoCl** single crystals ( $\lambda_{\text{exc}} = 785 \text{ nm}$ ).

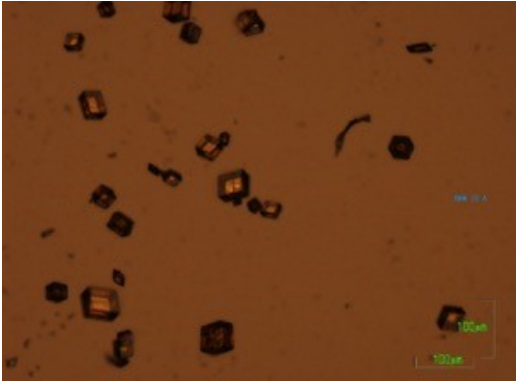

Dry crystals

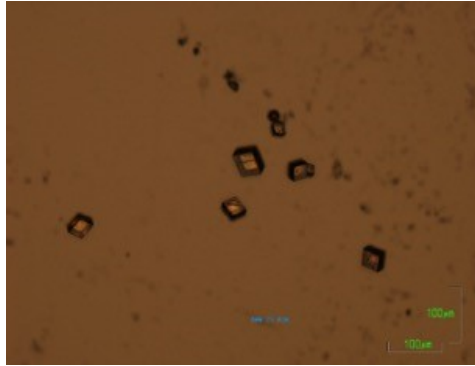

Crystals with acetonitrile

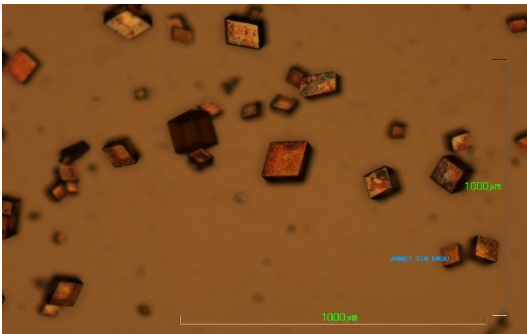

Dry crystals

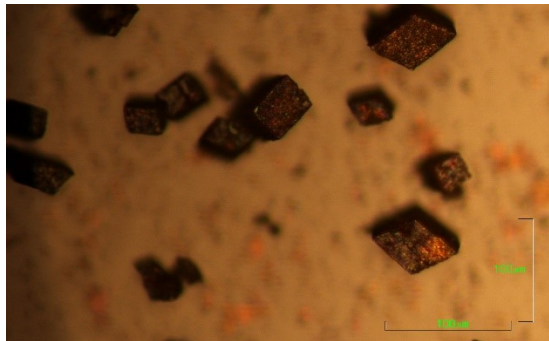

Crystals with dichloromethane

**Figure S5.** Evolution of **MoCl** crystals before and after contact with  $\text{CH}_3\text{CN}$  and  $\text{CH}_2\text{Cl}_2$ .

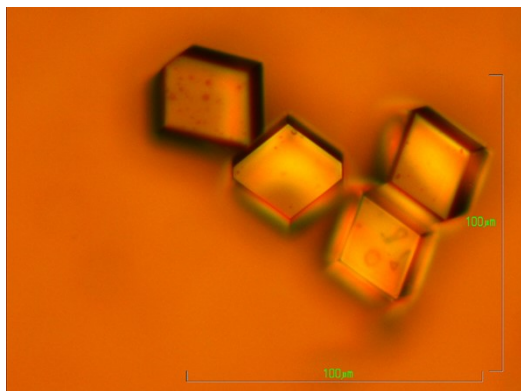

Dry sample

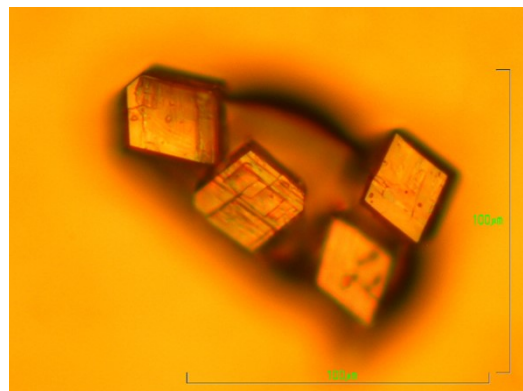

Wet sample. Time 0

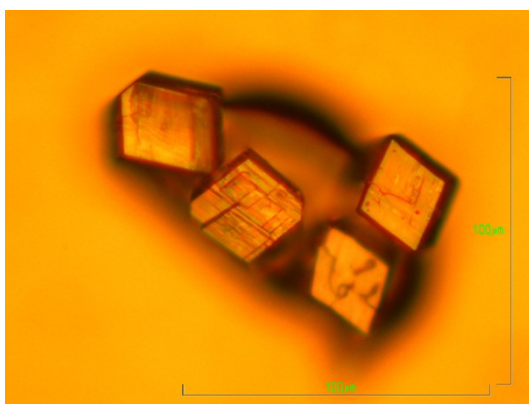

Wet sample, 1 hour

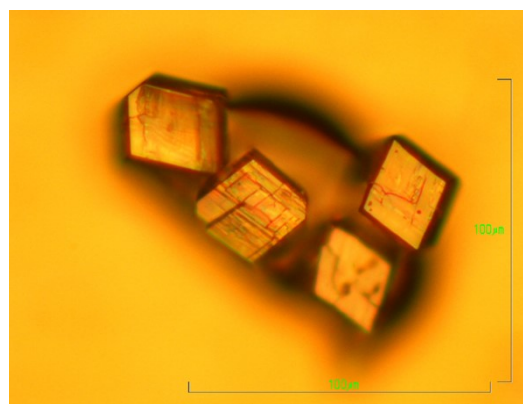

Wet sample, 3 hours

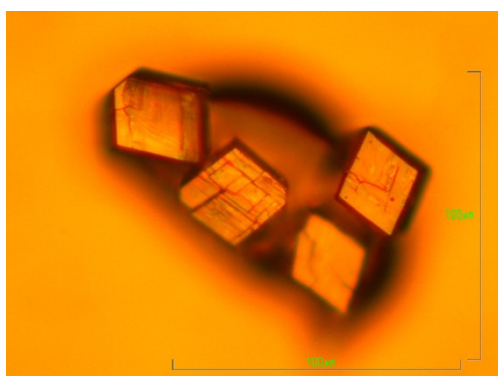

Wet sample, 24 hours

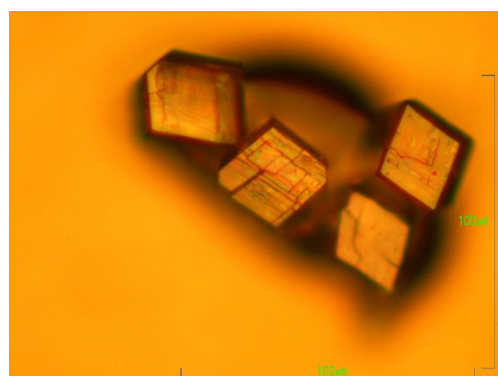

Wet sample, 28 days

**Figure S6.** Dry  $\text{MoCl}_5$  crystals and their evolution after contact with  $\text{BMIMBF}_4$ .

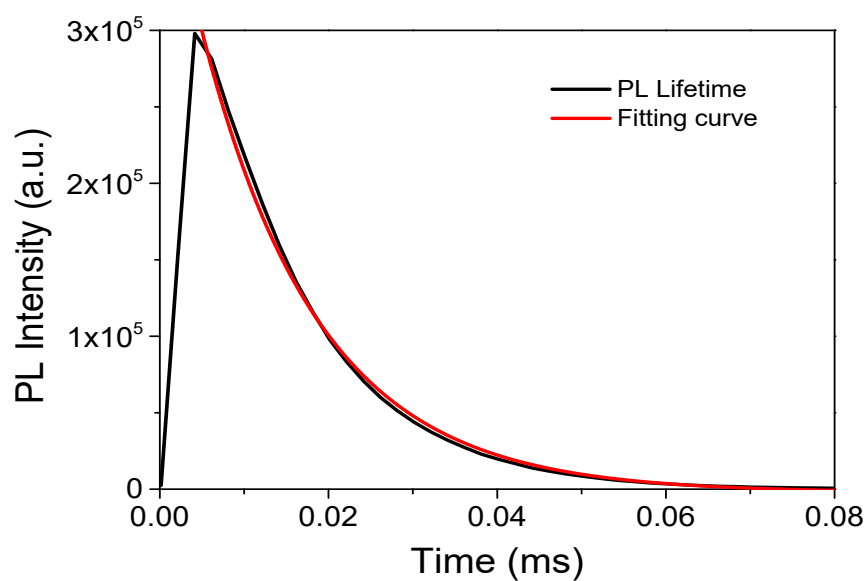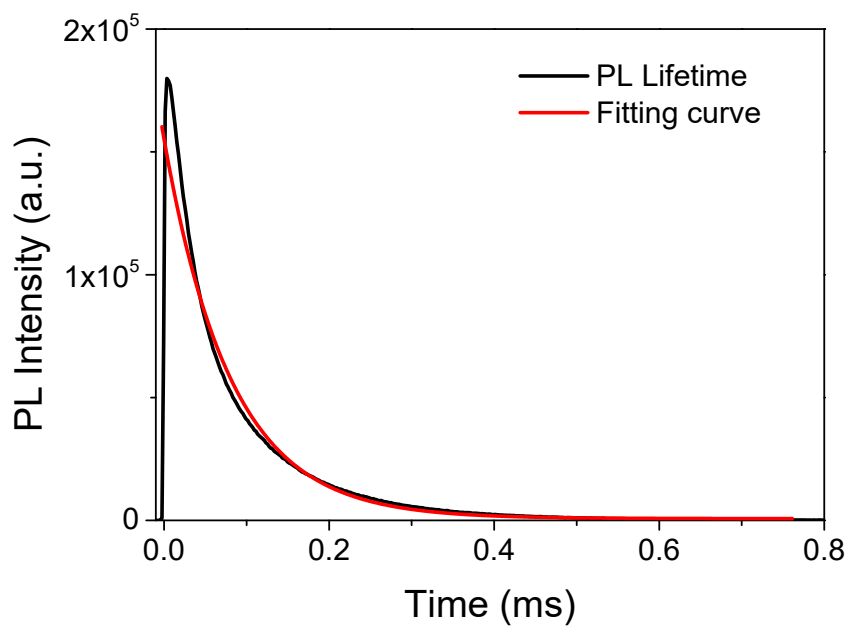

**Figure S7.** Luminescence decays lifetime of **MoBr** (top) and **MoCl** (bottom) single crystals (black lines). The red line corresponds to the fitting of a single-exponential decay model.



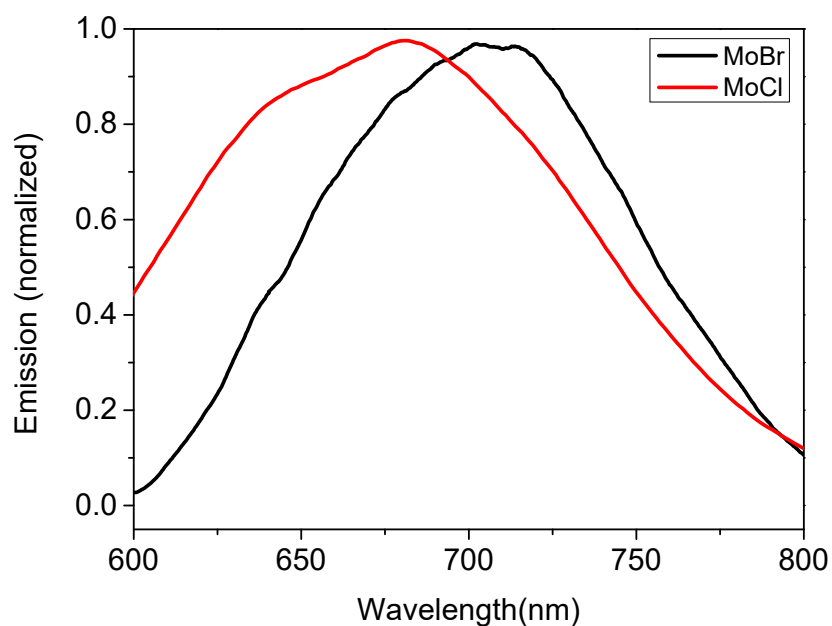

**Figure S8.** PL spectra of selected **MoCl** (red) and **MoBr** (black) single crystals selected among >20 single crystal specimens.

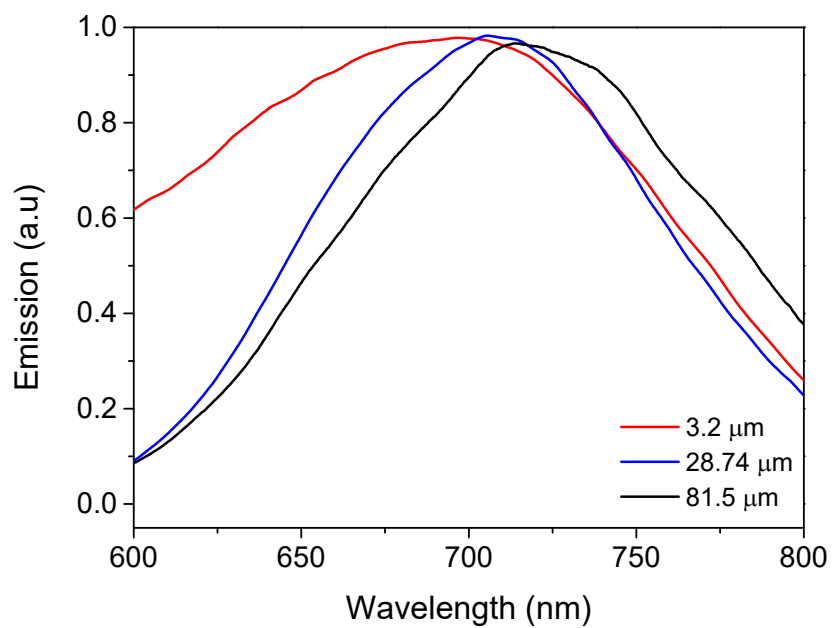

**Figure S9.** Emission wavelengths depending on **MoBr** single crystal size.

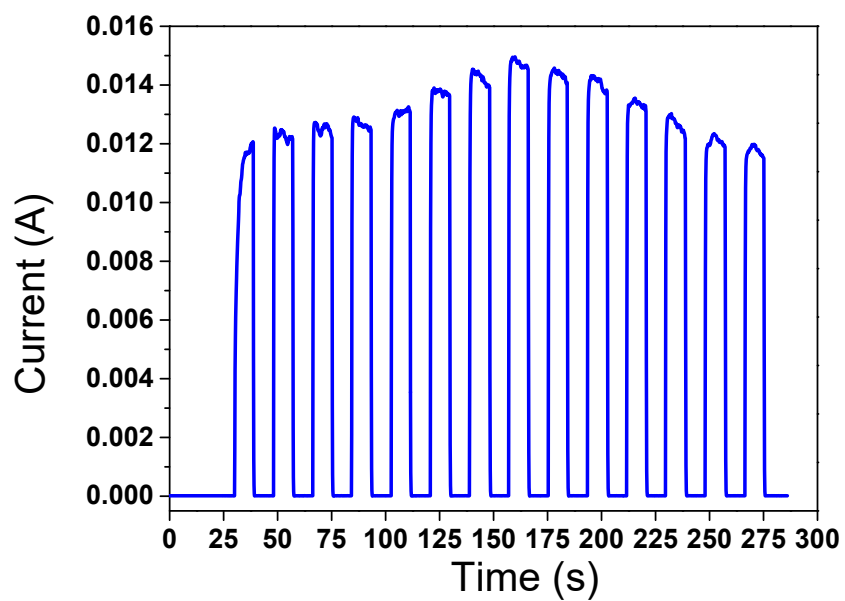

**Figure S10.** Current-time (I-t) curves under 405 nm LED light with 0.1 Hz light on/off cycles of a single crystal of MAPbBr<sub>3</sub> under  $\lambda_{\text{exc}} = 405$  nm.
